# Supplementary material for: Clinical Significance of Escherichia albertii
Source: PubMed Central journal article supplement (PMC3309589; doi:10.3201/eid1803.111401), 2012-03
Supplement: 11-1401-Techapp_18p.pdf [file 11-1401-Techapp_18p.pdf]

# Clinical Significance of *Escherichia albertii*

## Technical Appendix

### Bacterial strains, growth conditions, and DNA extraction

The 275 bacterial strains used were isolated in the laboratories participating in this study or from strain stocks from each laboratory. The sources of their isolation and other strain information are summarized in Technical Appendix Table 1. In brief, the 275 strains were isolated in Japan, Brazil, Germany, and Belgium. All of the strains had been originally identified as EPEC or EHEC. Among the 193 human isolates, 154 were isolated from patients with the clinical symptoms of a gastrointestinal infection, such as diarrhea (bloody or non-bloody), abdominal pain, vomiting, and fever. As for the remaining 39 human isolates, we confirmed that 7 were from asymptomatic carriers, while clinical records on the others were not available. The 76 animal isolates were mainly from wild birds, which were found dead due to unknown reasons and thus subjected to laboratory examinations, and healthy pigs; these isolates included several strains from other domestic and wild animals. The environmental strains were isolated from sand pit courts at elementary schools, parks, and shrines.) The *E. albertii* type strain LMG20976 was provided by RIKEN BioResource Center (Ibaraki, Japan). Bacterial cells were grown aerobically at 37°C in Luria-Bertani (LB) medium or on LB agar. Bacterial DNA used as template DNA for PCR was prepared by the alkaline-boiling method as described previously (1).

### Sequence-based intimin subtyping

DNA sequences of the entire *eae* genes were determined as described by Lacher *et al.* (2). Briefly, the 5' half of the gene and its upstream region were amplified by PCR using the cesT-F9/*eae*-F1 primer pair and KAPATaq (NIPPON Genetics, Tokyo, Japan), and the 3' half and the downstream region were amplified using the *eae*-R3/*escD*-R1 primer pair. Amplicons were sequenced with the primers used for PCR amplification on the ABI 3710 autosequencer (Life Technologies Corporation, CA). To fully sequence the 3' half, an additional sequence primer

(1669-1688) was used. Primer sequences and amplification conditions are listed in Technical Appendix Table 2.

Predicted amino acid sequences were aligned with those of the reference intimin subtypes listed in Technical Appendix Table 3 by the ClustalW program in MEGA4 (3). A phylogenetic tree was constructed with the neighbor-joining algorithm using MEGA4. Poisson correction was used to calculate protein distances. Bootstrap analysis with 1000 replicates was performed to evaluate the significance of internal branches. To define new intimin subtypes, we employed the cutoff value of 95% nucleotide sequence identity (4).

### **Multi-locus sequence (MLS) analysis**

To determine the phylogenetic relationships of the *eae*-positive strains, we performed MLS analysis. For this analysis, we selected one or two representative strains for each intimin subtype. When different serotypes were found within an intimin subtype, we selected one or two strains for each serotype; thus, 179 strains were analyzed in total.

MLS analysis was performed using the nucleotide sequences of 7 housekeeping genes (*adh*, *fumC*, *gyrB*, *icd*, *mdh*, *purA*, and *recA*). Target genes were amplified and sequenced according to the protocol provided from the UCC Web site (<http://mlst.ucc.ie/>). Using the concatenated nucleotide sequences of the 7 genes and the maximum composite likelihood model, a neighbor-joining tree was constructed using MEGA4 software. EcoR collection strains (5) and genome-sequenced *E. coli*, *E. fergusonii*, *E. albertii*, *Shigella* sp., and *Salmonella enterica* serovar Typhi strains were included in a phylogenetic representation.

### **PCR detection and sequencing of the *stx* and *cdtB* genes**

PCR screening was performed for the genes for Shiga toxins 1 and 2 (*stx1*, *stx2* and *stx2*-variants) and the B subunit of cytolethal-distending toxin (*cdtB*). All primers and PCR conditions used for this screening are shown in Technical Appendix Table 2. PCR amplification was performed using KAPATaq Extra DNA polymerase (KAPA Biosystems, Inc., MA). Subtypes and phylogenetic relationships of the *cdtB* genes were determined by direct sequencing of the amplicons on the ABI 3710 autosequencer using the primers used for PCR amplification.

## Detection of Stx production with or without mitomycin C (MMC) induction

The production of Stx<sub>2f</sub> by *stx2f*-positive *E. albertii* strains was determined by using a reverse-passive latex agglutination kit (VTEC-RPLA; Denka Seiken Co., Ltd., Tokyo, Japan). Bacterial cells were pre-cultured in 1 mL of Casamino Acids-yeast extract (CAYE) broth (Denka Seiken, Tokyo, Japan) overnight with shaking, and then inoculated to adjust OD<sub>600</sub> = 0.1 into 2 mL of fresh CAYE broth and followed by 16 hrs incubation (MMC-). For mitomycin C (MMC; Kyowa Hakko Kirin Co., Ltd., Tokyo, Japan) induction, 0.5 µl of 2 mg/mL MMC solution was added to the 2 mL culture at an hour incubation (final concentration of 50 µg/mL) and followed by 15 hrs incubation. Of the cell suspension after 16 hrs incubation, 1 mL culture was treated with 1 mL of polymyxin B (Sigma-Aldrich Japan, Tokyo, Japan; final concentration of 5,000 U/mL) for 1 hr at 37°C. The solution was centrifuged for 10 min at 9,000 rpm at 4°C and used for VTEC-RPLA assay according to the manufacturer's instruction. *E. albertii* strain LMG20976 (type strain; *stx*-negative) and strain CB9786 (*stx*-negative) were used as negative controls. EHEC O128:HNM strain EC1463 (*stx2f*-positive) and EHEC O157:H7 strain Sakai (*stx1*- and *stx2*-positive) were used as positive control (*stx2f* and *stx* genes, respectively). The result of this analysis was shown in Technical Appendix Table 4.

## Determination of the LEE integration sites

Three integration sites that have so far been identified for the LEE elements in various *E. coli* strains are the *pheV*, *selC*, and *pheU* tRNA gene loci. It is also known that although the gene organization of LEE core regions is highly conserved between strains, accessory regions of highly variable sizes and genetic structures often exist just downstream of the core region (6–8). In contrast, no or only small accessory regions have been identified upstream of the core region; thus, the genetic structures of the left (upstream) chromosome/LEE junctions are relatively well conserved. Therefore, by employing long-range PCR targeted to the *escR* gene in the LEE core region and chromosomal regions outside of the left chromosome/LEE junctions, we performed a systematic survey of the *pheV*, *selC*, and *pheU* loci of the *eae*-positive strains for the presence of LEE elements.

Long-range PCR screening was performed by using TaKaRa LA Taq polymerase (Takara Bio Inc. Ohtsu, Japan). Each locus was examined by PCR using an inside primer (*escR*-R) in

combination with outside primers targeted to the genomic regions adjacent to each tRNA gene locus. The outside primers were designed based on the genome sequences of the K-12 strain MG1655 (9) and 5 EHEC and EPEC strains (6,10,11). Primer sequences and amplification conditions are listed in Technical Appendix Table 5.

## Phenotype and biochemical characterization of *E. albertii* strains

The phenotypic and biochemical properties of the strains identified as *E. albertii* in this study and the *E. albertii* type strain (LMG20976) were examined by conventional methods (12). Carbohydrate-fermenting abilities were determined after 7 days of incubation at 37°C in Andrade peptone water (Oxoid, Cambridge, UK) containing one of the following 15 carbohydrates (Wako Pure Chemicals, Osaka, Japan): adonitol, arabinose, cellobiose, dulcitol, glucose, inositol, lactose, maltose, mannitol, rhamnose, salicin, sorbitol, sucrose, trehalose, and xylose. The  $\beta$ -glucuronidase activity was examined using CLIG medium (Kyokuto Pharmaceutical, Tokyo, Japan).

## Nucleotide sequence accession numbers

All nucleotide sequences obtained in this study have been deposited into the DDBJ/EMBL/GenBank database. The accession numbers are AB647359-AB647618 (for the *eae* genes), AB647619-AB647655 (for the *cdtB* genes), and AB647656-648908 (for the 7 housekeeping genes [*adh*, *fumC*, *gyrB*, *icd*, *mdh*, *purA*, and *recA*] used for MLS analysis).

## References

1. Ooka T, Terajima J, Kusumoto M, Iguchi A, Kurokawa K, Ogura Y, et al. Development of a multiplex PCR-based rapid typing method for enterohemorrhagic *Escherichia coli* O157 strains. J Clin Microbiol. 2009;47:2888–94. [PubMed http://dx.doi.org/10.1128/JCM.00792-09](http://dx.doi.org/10.1128/JCM.00792-09)
2. Lacher DW, Steinsland H, Whittam TS. Allelic subtyping of the intimin locus (*eae*) of pathogenic *Escherichia coli* by fluorescent RFLP. FEMS Microbiol Lett. 2006;261:80–7. [PubMed http://dx.doi.org/10.1111/j.1574-6968.2006.00328.x](http://dx.doi.org/10.1111/j.1574-6968.2006.00328.x)

3. Tamura K, Dudley J, Nei M, Kumar S. MEGA4: Molecular Evolutionary Genetics Analysis (MEGA) software version 4.0. *Mol Biol Evol.* 2007;24:1596–9. [PubMed](#)  
<http://dx.doi.org/10.1093/molbev/msm092>
4. Zhang WL, Kohler B, Oswald E, Beutin L, Karch H, Morabito S, et al. Genetic diversity of intimin genes of attaching and effacing *Escherichia coli* strains. *J Clin Microbiol.* 2002;40:4486–92. [PubMed](#) <http://dx.doi.org/10.1128/JCM.40.12.4486-4492.2002>
5. Ochman H, Selander RK. Standard reference strains of *Escherichia coli* from natural populations. *J Bacteriol.* 1984;157:690–3. [PubMed](#)
6. Ogura Y, Ooka T, Iguchi A, Toh H, Asadulghani M, Oshima K, et al. Comparative genomics reveal the mechanism of the parallel evolution of O157 and non-O157 enterohemorrhagic *Escherichia coli*. *Proc Natl Acad Sci U S A.* 2009;106:17939–44. [PubMed](#)  
<http://dx.doi.org/10.1073/pnas.0903585106>
7. Jores J, Rumer L, Wieler LH. Impact of the locus of enterocyte effacement pathogenicity island on the evolution of pathogenic *Escherichia coli*. *Int J Med Microbiol.* 2004;294:103–13. [PubMed](#)  
<http://dx.doi.org/10.1016/j.ijmm.2004.06.024>
8. Müller D, Benz I, Liebchen A, Gallitz I, Karch H, Schmidt MA. Comparative analysis of the locus of enterocyte effacement and its flanking regions. *Infect Immun.* 2009;77:3501–13. [PubMed](#)  
<http://dx.doi.org/10.1128/IAI.00090-09>
9. Blattner FR, Plunkett G, Bloch CA, Perna NT, Burland V, Riley M, et al. The complete genome sequence of *Escherichia coli* K-12. *Science.* 1997;277:1453–62. [PubMed](#)  
<http://dx.doi.org/10.1126/science.277.5331.1453>
10. Hayashi T, Makino K, Ohnishi M, Kurokawa K, Ishii K, Yokoyama K, et al. Complete genome sequence of enterohemorrhagic *Escherichia coli* O157:H7 and genomic comparison with a laboratory strain K-12. *DNA Res.* 2001;8:11–22. [PubMed](#) <http://dx.doi.org/10.1093/dnares/8.1.11>
11. Iguchi A, Thomson NR, Ogura Y, Saunders D, Ooka T, Henderson IR, et al. Complete genome sequence and comparative genome analysis of enteropathogenic *Escherichia coli* O127:H6 strain E2348/69. *J Bacteriol.* 2009;191:347–54. [PubMed](#) <http://dx.doi.org/10.1128/JB.01238-08>
12. Ewing WH. The Genus *Escherichia*. In: Ewing WH, Edwards PR editors. *Identification of Enterobacteriaceae*, 4th ed. New York: Elsevier Science Publishing; 1986. p. 93–134.

Technical Appendix Table 1. Detailed information of the strains used in this study

| Serotype†   | strain name | year of isolate | origin      | countries | symptoms or notes                                           | intimin subtypes | LEE integration sites (tRNA gene) | presence or absence |      | MLST analysis | References |
|-------------|-------------|-----------------|-------------|-----------|-------------------------------------------------------------|------------------|-----------------------------------|---------------------|------|---------------|------------|
|             |             |                 |             |           |                                                             |                  |                                   | stx1&2&2f           | cdtB |               |            |
| O51:H40     | EC06-71     | 2006            | human       | Japan     | symptomatic                                                 | theta            | NT                                | -                   | -    | Y             | this study |
| O40/33:H34  | EC06-80     | 2006            | human       | Japan     | symptomatic (diarrhea, abdominal pain, fever)               | (lambda)         | selC                              | -                   | -    | Y             | this study |
| O88:H8      | EC06-90     | 2006            | human       | Japan     | symptomatic                                                 | iota1            | selC                              | -                   | +    | Y             | this study |
| O51:H40     | EC06-118    | 2006            | human       | Japan     | symptomatic (diarrhea, abdominal pain)                      | theta            | NT                                | -                   | -    | Y             | this study |
| OUT:H34     | EC06-119    | 2006            | human       | Japan     | symptomatic (diarrhea, abdominal pain)                      | iota1            | selC                              | -                   | -    | Y             | this study |
| O175:NM     | EC06-170    | 2006            | human       | Japan     | symptomatic                                                 | xi               | pheU                              | -                   | +    | Y‡            | this study |
| O55:H6      | 18H89       | 2006            | human       | Japan     | symptomatic                                                 | iota1            | selC                              | -                   | +    | Y             | this study |
| O145:H34    | 19H198      | 2007            | human       | Japan     | symptomatic (diarrhea, abdominal pain, fever)               | iota1            | selC                              | -                   | -    | Y             | this study |
| O23:H8      | 19H226      | 2007            | human       | Japan     | symptomatic (diarrhea, abdominal pain)                      | theta            | NT                                | -                   | -    | Y             | this study |
| O65:NM      | 20H38       | 2008            | human       | Japan     | symptomatic (diarrhea)                                      | sigma            | pheU                              | -                   | +    | Y‡            | this study |
| O152/115:NM | 20H183      | 2008            | human       | Japan     | symptomatic (diarrhea)                                      | N1.3             | pheU                              | -                   | +    | Y‡            | this study |
| O113:H19    | 20H186      | 2008            | human       | Japan     | symptomatic (diarrhea)                                      | epsilon2         | selC                              | -                   | +    | Y             | this study |
| O114:H19    | 20H215      | 2008            | human       | Japan     | symptomatic (diarrhea)                                      | epsilon2         | selC                              | -                   | +    | Y             | this study |
| O101:NM     | 20H250      | 2009            | human       | Japan     | symptomatic (diarrhea, fever)                               | (iota2)          | pheU                              | -                   | -    | Y             | this study |
| O101:NM     | 21H147      | 2009            | human       | Japan     | symptomatic (diarrhea)                                      | iota2            | pheU                              | -                   | +    | Y             | this study |
| O21:H8      | EC01-376    | 2001            | environment | Japan     | sand pit court                                              | theta            | selC                              | -                   | +    | Y             | this study |
| O66:H21     | EC01-380    | 2001            | environment | Japan     | sand pit court                                              | theta            | NT                                | -                   | +    | Y             | this study |
| O142:H34    | EC01-383    | 2001            | environment | Japan     | sand pit court                                              | alpha1           | selC                              | -                   | -    | Y             | this study |
| OUT:H21     | EC01-386    | 2001            | environment | Japan     | sand pit court                                              | theta            | NT                                | -                   | +    | Y             | this study |
| O51:H49     | EC01-403    | 2001            | environment | Japan     | sand pit court                                              | alpha1           | selC                              | -                   | +    | Y             | this study |
| OUT:H34     | EC01-406    | 2001            | environment | Japan     | sand pit court                                              | alpha2           | selC                              | -                   | -    | Y             | this study |
| O128:NM     | EC01-460    | 2001            | human       | Japan     | symptomatic (diarrhea, abdominal pain, fever)               | beta1            | NT                                | -                   | -    | Y             | this study |
| O5:NM       | EC03-71     | 2003            | human       | Japan     | symptomatic (diarrhea, bloody stool, fever, abdominal pain) | beta1            | NT                                | stx1&stx2           | -    | Y             | this study |
| OUT:H34     | EC03-82     | 2003            | human       | Japan     | symptomatic (diarrhea, bloody stool, fever, abdominal pain) | iota1            | selC                              | -                   | -    | Y             | this study |
| O51:H40     | EC03-93     | 2003            | human       | Japan     | symptomatic (diarrhea, abdominal pain)                      | epsilon1         | NT                                | -                   | -    | Y             | this study |
| OUT:H6      | EC03-126    | 2003            | human       | Japan     | symptomatic (diarrhea)                                      | beta2            | selC                              | -                   | -    | Y             | this study |

| Serotype†   | strain name | year of isolate | origin | countries | symptoms or notes                      | intimin subtypes | LEE integration sites (tRNA gene) | presence or absence |      | MLST analysis | References |
|-------------|-------------|-----------------|--------|-----------|----------------------------------------|------------------|-----------------------------------|---------------------|------|---------------|------------|
|             |             |                 |        |           |                                        |                  |                                   | stx1&2&f            | cdtB |               |            |
| O181:NM     | EC03-127    | 2003            | human  | Japan     | symptomatic (diarrhea)                 | (epsilon3)       | pheU                              | -                   | +    | Y‡            | this study |
| O180:NM     | EC03-144    | 2003            | human  | Japan     | asymptomatic carrier                   | rho              | pheU                              | -                   | -    | Y             | this study |
| O153:H21    | EC03-152    | 2003            | human  | Japan     | symptomatic (diarrhea, fever)          | theta            | NT                                | -                   | -    | Y             | this study |
| OUT:NM      | EC03-195    | 2003            | human  | Japan     | symptomatic                            | N5               | pheU                              | -                   | +    | Y‡            | this study |
| OUT:H21     | EC03-207    | 2003            | animal | Japan     | asymptomatic                           | theta            | selC                              | -                   | -    | Y             | this study |
| OUT:H21     | EC03-211    | 2003            | animal | Japan     | asymptomatic                           | theta            | NT                                | -                   | -    | Y             | this study |
| OUT:H6      | EC03-224    | 2003            | animal | Japan     | asymptomatic                           | beta2            | selC                              | -                   | -    | Y             | this study |
| OUT:H34     | EC04-81     | 2004            | human  | Japan     | symptomatic (abdominal pain, vomiting) | iota1            | selC                              | -                   | -    | Y             | this study |
| O88:H25     | EC04-258    | 2004            | human  | Japan     | symptomatic (diarrhea, vomiting)       | epsilon2         | selC                              | -                   | -    | Y             | this study |
| O21:H6      | EC04-268    | 2004            | human  | Japan     | symptomatic (diarrhea)                 | alpha2           | selC                              | -                   | -    | Y             | this study |
| O117:H21    | EC04-311    | 2004            | human  | Japan     | symptomatic (diarrhea, vomiting)       | theta            | NT                                | -                   | -    | Y             | this study |
| O152:H38    | EC04-437    | 2004            | human  | Japan     | symptomatic (abdominal pain)           | epsilon1         | NT                                | -                   | -    | Y             | this study |
| OUT:H2      | EC04-500    | 2004            | human  | Japan     | symptomatic (diarrhea)                 | beta1            | NT                                | -                   | -    | Y             | this study |
| OUT:H34     | EC04-569    | 2004            | human  | Japan     | symptomatic (diarrhea, vomiting)       | iota1            | selC                              | -                   | -    | Y             | this study |
| OUT:H21     | EC04-572    | 2004            | human  | Japan     | symptomatic (diarrhea, abdominal pain) | beta1            | NT                                | -                   | -    | Y             | this study |
| O49:H10     | EC04-588    | 2004            | human  | Japan     | symptomatic                            | (kappa)          | selC                              | -                   | -    | Y             | this study |
| OUT:NM      | EC05-44     | 2005            | human  | Japan     | symptomatic                            | N4               | NT                                | -                   | +    | Y‡            | this study |
| O129/13:H11 | EC05-63     | 2005            | human  | Japan     | symptomatic (diarrhea)                 | omicron          | pheU                              | -                   | -    | Y             | this study |
| O108:H40    | EC05-66     | 2005            | human  | Japan     | symptomatic (diarrhea, abdominal pain) | epsilon1         | NT                                | -                   | -    | Y             | this study |
| OUT:NM      | EC05-81     | 2005            | human  | Japan     | symptomatic                            | N3               | pheU                              | -                   | +    | Y‡            | this study |
| O70:H11     | EC05-86     | 2005            | human  | Japan     | asymptomatic carrier                   | epsilon1         | NT                                | -                   | -    | Y             | this study |
| O128:NM     | EC05-93     | 2005            | human  | Japan     | symptomatic                            | beta1            | NT                                | -                   | -    | N             | this study |
| OUT:H34     | EC05-94     | 2005            | human  | Japan     | symptomatic                            | alpha2           | selC                              | -                   | -    | N             | this study |
| O71:H49     | EC05-95     | 2005            | human  | Japan     | asymptomatic carrier                   | kappa            | selC                              | -                   | -    | Y             | this study |
| O10:NM      | EC05-134    | 2005            | human  | Japan     | symptomatic (diarrhea, abdominal pain) | iota1            | selC                              | -                   | -    | Y             | this study |
| OUT:NM      | EC05-160    | 2005            | human  | Japan     | symptomatic                            | sigma            | pheU                              | -                   | +    | Y‡            | this study |
| OUT:49      | EC05-165    | 2005            | human  | Japan     | symptomatic                            | alpha1           | selC                              | -                   | -    | Y             | this study |
| OUT:H4      | EC05-171    | 2005            | human  | Japan     | symptomatic                            | omicron          | pheU                              | -                   | -    | Y             | this study |
| O171:H19    | 12H133      | 2000            | human  | Japan     | NI                                     | epsilon2         | selC                              | -                   | -    | Y             | this study |
| O119:H2     | 12H377      | 2000            | human  | Japan     | NI                                     | beta1            | NT                                | -                   | -    | Y             | this study |
| O2:H49      | 17H285      | 2005            | human  | Japan     | symptomatic                            | iota1            | selC                              | -                   | -    | Y             | this study |
| OUT:HND     | 93010       | 1993.6.18       | human  | Japan     | symptomatic (diarrhea)                 | mu               | selC                              | -                   | -    | Y             | this study |
| OUT:H40     | 94037       | 1994.6.29       | human  | Japan     | symptomatic (diarrhea, fever)          | (eta2)           | selC                              | -                   | +    | Y             | this study |
| OUT:HND     | 94046-2     | 1994.7.25       | human  | Japan     | symptomatic (bloody diarrhea)          | epsilon2         | selC                              | -                   | -    | Y             | this study |

| Serotype† | strain name | year of isolate | origin | countries | symptoms or notes                                    | intimin subtypes | LEE integration sites (tRNA gene) | presence or absence |      | MLST analysis | References |
|-----------|-------------|-----------------|--------|-----------|------------------------------------------------------|------------------|-----------------------------------|---------------------|------|---------------|------------|
|           |             |                 |        |           |                                                      |                  |                                   | stx1&2&f            | cdtB |               |            |
| OUT:H7    | 94064       | 1994.9.19       | human  | Japan     | symptomatic (diarrhea)                               | theta            | NT                                | -                   | -    | Y             | this study |
| O86a:HND  | 94308       | 1994.6.25       | human  | Japan     | NI                                                   | iota1            | selC                              | -                   | -    | Y             | this study |
| O55:H7    | 94327       | 1994.7.12       | human  | Japan     | NI                                                   | gamma1           | selC                              | -                   | -    | Y             | this study |
| O26:H21   | 94358       | 1994.8.6        | human  | Japan     | NI                                                   | theta            | NT                                | -                   | -    | N             | this study |
| OUT:HND   | 94368       | 1994.8.16       | human  | Japan     | NI                                                   | theta            | NT                                | -                   | -    | Y             | this study |
| OUT:HND   | 94389       | 1994.9.8        | human  | Japan     | NI                                                   | sigma            | pheU                              | -                   | +    | Y‡            | this study |
| OUT:HNM   | 94414       | 1994.10.12      | human  | Japan     | NI                                                   | theta            | NT                                | -                   | -    | Y             | this study |
| O55:H7    | 95012       | 1995.5.11       | human  | Japan     | symptomatic (diarrhea)                               | gamma1           | selC                              | -                   | -    | N             | this study |
| O119:H2   | 95028       | 1995.6.12       | human  | Japan     | symptomatic (diarrhea)                               | beta1            | NT                                | -                   | -    | Y             | this study |
| OUT:HND   | 95032       | 1995.6.16       | human  | Japan     | symptomatic (diarrhea)                               | iota1            | selC                              | -                   | -    | Y             | this study |
| O26:HNM   | 95036-2     | 1995.6.18       | human  | Japan     | symptomatic (diarrhea)                               | beta1            | NT                                | -                   | -    | Y             | this study |
| OUT:HND   | 95037       | 1995.6.19       | human  | Japan     | symptomatic (diarrhea, fever)                        | epsilon2         | selC                              | -                   | -    | Y             | this study |
| OUT:HND   | 95301       | 1995.5.9        | human  | Japan     | symptomatic (bloody diarrhea, fever, abdominal pain) | iota1            | selC                              | -                   | -    | Y             | this study |
| O15:HND   | 95473       | 1995.10.27      | human  | Japan     | NI                                                   | beta1            | NT                                | -                   | -    | Y             | this study |
| O153:H7   | 960064      | 1996.7.2        | human  | Japan     | symptomatic (bloody diarrhea)                        | beta1            | selC                              | -                   | -    | Y             | this study |
| O26:HNM   | 960067      | 1996.7.5        | human  | Japan     | symptomatic (diarrhea)                               | beta1            | NT                                | -                   | -    | N             | this study |
| O126:HND  | 960134      | 1996.8.2        | human  | Japan     | symptomatic (diarrhea, fever)                        | iota1            | selC                              | -                   | -    | Y             | this study |
| OUT:HND   | 960135      | 1996.8.2        | human  | Japan     | symptomatic (diarrhea, fever)                        | gamma1           | selC                              | -                   | -    | Y             | this study |
| O20:HND   | 960175      | 1996.8.23       | human  | Japan     | symptomatic (diarrhea, fever)                        | beta2            | selC                              | -                   | -    | N             | this study |
| OUT:HND   | 960185      | 1996.8.29       | human  | Japan     | symptomatic (bloody diarrhea)                        | beta2            | selC                              | -                   | -    | Y             | this study |
| OUT:HND   | 960192      | 1996.8.31       | human  | Japan     | symptomatic (diarrhea, fever)                        | gamma1           | selC                              | -                   | -    | Y             | this study |
| O115:HND  | 960719      | 1996.9.30       | human  | Japan     | symptomatic (diarrhea)                               | theta            | NT                                | -                   | -    | N             | this study |
| O20:H6    | 960241      | 1996.3.18       | human  | Japan     | NI                                                   | beta2            | selC                              | -                   | -    | Y             | this study |
| O115:HND  | 960242      | 1996.3.19       | human  | Japan     | symptomatic (bloody stool, abdominal pain, vomiting) | beta2            | selC                              | -                   | -    | Y             | this study |
| O15:H2    | 960261      | 1996.5.13       | human  | Japan     | symptomatic (bloody stool, fever, abdominal pain)    | beta1            | NT                                | -                   | -    | Y             | this study |
| OUT:HND   | 960296      | 1996.6.25       | human  | Japan     | NI                                                   | iota1            | selC                              | -                   | -    | Y             | this study |
| OUT:HND   | 960337      | 1996.7.15       | human  | Japan     | NI                                                   | zeta3            | selC                              | -                   | -    | Y             | this study |
| NI        | 960349      | 1996.7.19       | human  | Japan     | NI                                                   | zeta3            | selC                              | -                   | -    | Y             | this study |
| OUT:HND   | 960446      | 1996.8.8        | human  | Japan     | NI                                                   | beta2            | selC                              | -                   | -    | Y             | this study |
| O26:HND   | 960462      | 1996.8.29       | human  | Japan     | NI                                                   | kappa            | selC                              | -                   | -    | Y             | this study |
| OUT:HND   | 960468      | 1996.9.6        | human  | Japan     | NI                                                   | eta2             | selC                              | -                   | -    | Y             | this study |
| O26:HNM   | 960496      | 1996.10.14      | human  | Japan     | NI                                                   | beta1            | selC                              | -                   | -    | N             | this study |
| O119:HNM  | 97054-1     | 1997.6.13       | human  | Japan     | symptomatic (diarrhea,                               | theta            | NT                                | -                   | -    | Y             | this study |

| Serotype† | strain name | year of isolate | origin | countries | symptoms or notes                                       | intimin subtypes | LEE integration sites (tRNA gene) | presence or absence |      | MLST analysis | References |
|-----------|-------------|-----------------|--------|-----------|---------------------------------------------------------|------------------|-----------------------------------|---------------------|------|---------------|------------|
|           |             |                 |        |           |                                                         |                  |                                   | stx1&2&2f           | cdtB |               |            |
|           |             |                 |        |           | abdominal pain, fever)                                  |                  |                                   |                     |      |               |            |
| OUT:HND   | 97105       | 1997.8.8        | human  | Japan     | symptomatic (diarrhea, vomiting)                        | beta1            | pheU                              | -                   | -    | Y             | this study |
| NI        | 97144       | 1997.9.11       | human  | Japan     | symptomatic (bloody diarrhea)                           | theta            | NT                                | -                   | -    | Y             | this study |
| O26:HNM   | 97207       | 1997.11.14      | human  | Japan     | symptomatic (bloody diarrhea)                           | beta1            | NT                                | -                   | -    | N             | this study |
| O55:H7    | 97214       | 1997.11         | human  | Japan     | symptomatic                                             | gamma1           | selC                              | -                   | -    | N             | this study |
| O55:HND   | 97253-2     | 1997.12.20      | human  | Japan     | symptomatic (bloody diarrhea)                           | gamma1           | selC                              | -                   | -    | N             | this study |
| O157:HND  | 97255       | 1997.12.17      | human  | Japan     | symptomatic (diarrhea)                                  | alpha1           | selC                              | -                   | -    | Y             | this study |
| O146:H21  | 97603       | 1997.6.9        | human  | Japan     | NI                                                      | theta            | NT                                | -                   | -    | Y             | this study |
| O167:HND  | 97604       | 1997.6.10       | human  | Japan     | NI                                                      | beta1            | NT                                | -                   | -    | Y             | this study |
| O168:HND  | 97650       | 1997.6.21       | human  | Japan     | NI                                                      | gamma1           | selC                              | -                   | -    | Y             | this study |
| O128:HND  | 97651       | 1997.6.21       | human  | Japan     | symptomatic (diarrhea, abdominal pain, vomiting, fever) | beta1            | NT                                | -                   | -    | N             | this study |
| OUT:HND   | 97674-2     | 1997.6.30       | human  | Japan     | symptomatic (bloody stool, abdominal pain)              | epsilon2         | selC                              | -                   | -    | Y             | this study |
| O128:H2   | 97756       | 1997.7.19       | human  | Japan     | symptomatic (diarrhea)                                  | beta1            | NT                                | -                   | -    | Y             | this study |
| OUT:HND   | 97845       | 1997.8.8        | human  | Japan     | NI                                                      | iota1            | selC                              | -                   | -    | Y             | this study |
| O126:H6   | 97846       | 1997.8.8        | human  | Japan     | symptomatic (diarrhea, fever)                           | alpha2           | selC                              | -                   | -    | Y             | this study |
| O146:H7   | 97938       | 1997.9.1        | human  | Japan     | symptomatic (bloody diarrhea, abdominal pain)           | epsilon1         | NT                                | -                   | -    | Y             | this study |
| OUT:HND   | 971107      | 1997.12.20      | human  | Japan     | symptomatic (diarrhea)                                  | epsilon1         | NT                                | -                   | -    | Y             | this study |
| O55:H7    | 98078       | 1998.5.26       | human  | Japan     | NI                                                      | beta1            | pheU                              | -                   | -    | Y             | this study |
| O55:H7    | 98117       | 1998.6.24       | human  | Japan     | symptomatic (diarrhea)                                  | gamma1           | selC                              | -                   | -    | N             | this study |
| OUT:HND   | 98257       | 1998.10.28      | human  | Japan     | symptomatic (bloody diarrhea)                           | theta            | NT                                | -                   | -    | Y             | this study |
| O153:H7   | 98275       | 1998.11.6       | human  | Japan     | NI                                                      | beta1            | NT                                | -                   | -    | Y             | this study |
| O20:HNM   | 98288       | 1998.11.30      | human  | Japan     | symptomatic (diarrhea, vomiting, fever)                 | beta2            | selC                              | -                   | -    | Y             | this study |
| O55:H7    | 99600       | 1999.7.8        | human  | Japan     | symptomatic (diarrhea, abdominal pain)                  | gamma1           | selC                              | -                   | -    | N             | this study |
| OUT:H2    | 99622       | 1999.8.11       | human  | Japan     | symptomatic (diarrhea, abdominal pain)                  | beta1            | selC                              | -                   | -    | Y             | this study |
| O119:HNM  | 99638       | 1999.8.23       | human  | Japan     | symptomatic (diarrhea)                                  | beta1            | selC                              | -                   | -    | Y             | this study |
| OUT:HND   | 99066       | 1999.8.3        | human  | Japan     | symptomatic (diarrhea)                                  | iota1            | selC                              | -                   | -    | Y             | this study |
| O127a:H40 | 99067       | 1999.8.2        | human  | Japan     | symptomatic (diarrhea, abdominal pain)                  | theta            | NT                                | -                   | -    | Y             | this study |
| O153:H7   | 99674       | 1999.9.30       | human  | Japan     | symptomatic (diarrhea)                                  | beta1            | selC                              | -                   | -    | N             | this study |
| O119:HNM  | 99697       | 1999.10.17      | human  | Japan     | symptomatic (bloody diarrhea, fever)                    | beta1            | pheU                              | -                   | -    | N             | this study |
| O26:HNM   | 540         | 2000.4          | human  | Japan     | symptomatic (diarrhea)                                  | beta1            | NT                                | -                   | -    | N             | this study |

| Serotype† | strain name | year of isolate | origin | countries | symptoms or notes                                 | intimin subtypes | LEE integration sites (tRNA gene) | presence or absence |      | MLST analysis | References |
|-----------|-------------|-----------------|--------|-----------|---------------------------------------------------|------------------|-----------------------------------|---------------------|------|---------------|------------|
|           |             |                 |        |           |                                                   |                  |                                   | stx1&2&2f           | cdtB |               |            |
| O55:H7    | 544         | 2000.4.21       | human  | Japan     | symptomatic (bloody stool)                        | gamma1           | selC                              | -                   | -    | N             | this study |
| OUT:HND   | 24          | 2000.4.14       | human  | Japan     | symptomatic (diarrhea, abdominal pain)            | (epsilon3)       | pheU                              | -                   | +    | Y‡            | this study |
| O55:H7    | 594         | 2000.7          | human  | Japan     | symptomatic (diarrhea, abdominal pain, vomiting)  | gamma1           | selC                              | -                   | -    | N             | this study |
| O128:H2   | 595         | 2000.7.22       | human  | Japan     | symptomatic (diarrhea, abdominal pain, fever)     | beta1            | NT                                | -                   | -    | N             | this study |
| O26:H11   | 608         | 2000.8.4        | human  | Japan     | symptomatic (diarrhea, fever)                     | beta1            | NT                                | -                   | -    | N             | this study |
| O128:H2   | 618         | 2000.8.10       | human  | Japan     | symptomatic (diarrhea, abdominal pain)            | beta1            | pheV                              | -                   | -    | N             | this study |
| O26:HUT   | 626         | 2000.8          | human  | Japan     | symptomatic (diarrhea, vomiting)                  | theta            | NT                                | -                   | -    | Y             | this study |
| O119:HNM  | 629         | 2000.8.25       | human  | Japan     | NI                                                | beta1            | pheU                              | -                   | -    | N             | this study |
| O159:HNM  | 664         | 2000.10.16      | human  | Japan     | symptomatic (diarrhea)                            | theta            | NT                                | -                   | -    | Y             | this study |
| O128:H2   | 674         | 2000.10.27      | human  | Japan     | NI                                                | beta1            | NT                                | -                   | -    | N             | this study |
| OUT:HND   | 80          | 2000.10.6       | human  | Japan     | symptomatic (bloody stool)                        | theta            | NT                                | -                   | -    | Y             | this study |
| O126:H19  | 1558        | 2001.6.16       | human  | Japan     | symptomatic (diarrhea, abdominal pain, vomiting)  | iota1            | selC                              | -                   | -    | Y             | this study |
| O124:H16  | 01601-2     | 2001.7.28       | human  | Japan     | NI                                                | rho              | pheU                              | -                   | -    | Y             | this study |
| OUT:HNM   | 1065        | 2001.7          | human  | Japan     | symptomatic (diarrhea)                            | theta            | NT                                | -                   | -    | Y             | this study |
| O128:H2   | 1614        | 2001.8.16       | human  | Japan     | NI                                                | beta1            | NT                                | -                   | -    | N             | this study |
| O20:H6    | 1086        | 2001.8.17       | human  | Japan     | symptomatic (diarrhea, vomiting)                  | beta2            | selC                              | -                   | -    | N             | this study |
| O114:H19  | 1631        | 2001.9.4        | human  | Japan     | NI                                                | epsilon2         | selC                              | -                   | -    | Y             | this study |
| OUT:H21   | 1121        | 2001.10.10      | human  | Japan     | symptomatic (diarrhea)                            | theta            | selC                              | -                   | -    | Y             | this study |
| OUT:H6    | 1128        | 2001.10.18      | human  | Japan     | symptomatic (bloody stool, abdominal pain, fever) | beta2            | selC                              | -                   | -    | Y             | this study |
| O55:H7    | 1687        | 2001.11         | human  | Japan     | symptomatic (bloody stool, fever)                 | gamma1           | selC                              | -                   | -    | N             | this study |
| O55:H7    | 01689-1     | 2001.11.27      | human  | Japan     | symptomatic (diarrhea, fever)                     | gamma1           | selC                              | -                   | -    | N             | this study |
| O119:HNM  | 1691        | 2001.11.29      | human  | Japan     | symptomatic (diarrhea, abdominal pain)            | beta1            | pheU                              | -                   | -    | N             | this study |
| O119:HNM  | 2528        | 2002.4.8        | human  | Japan     | symptomatic (bloody stool)                        | beta1            | pheU                              | -                   | -    | N             | this study |
| OUT:HND   | 2059        | 2002.6.5        | human  | Japan     | symptomatic (diarrhea, vomiting, fever)           | alpha2           | selC                              | -                   | -    | Y             | this study |
| O55:H7    | 2075        | 2002.6.27       | human  | Japan     | symptomatic (diarrhea)                            | beta1            | pheV                              | -                   | -    | Y             | this study |
| O128:H2   | 2584        | 2002.7.13       | human  | Japan     | symptomatic (diarrhea, fever)                     | beta1            | pheV                              | -                   | -    | N             | this study |

| Serotype† | strain name | year of isolate | origin | countries | symptoms or notes                                 | intimin subtypes | LEE integration sites (tRNA gene) | presence or absence |      | MLST analysis | References |
|-----------|-------------|-----------------|--------|-----------|---------------------------------------------------|------------------|-----------------------------------|---------------------|------|---------------|------------|
|           |             |                 |        |           |                                                   |                  |                                   | stx1&2&2f           | cdtB |               |            |
| O128:HND  | 2595        | 2002.7.22       | human  | Japan     | symptomatic (diarrhea, fever)                     | beta1            | pheV                              | -                   | -    | N             | this study |
| O55:H7    | 2604        | 2002.8.3        | human  | Japan     | NI                                                | gamma1           | selC                              | -                   | -    | N             | this study |
| O55:H7    | 2612        | 2002.8.12       | human  | Japan     | NI                                                | gamma1           | selC                              | -                   | -    | N             | this study |
| O55:H7    | 2626        | 2002.8.26       | human  | Japan     | symptomatic (diarrhea, fever)                     | gamma1           | selC                              | -                   | -    | N             | this study |
| OUT:HND   | 2184        | 2002.11.25      | human  | Japan     | symptomatic (diarrhea, vomiting)                  | beta2            | selC                              | -                   | -    | Y             | this study |
| O55:H7    | 3114        | 2003.7.30       | human  | Japan     | symptomatic (diarrhea, fever)                     | gamma1           | selC                              | -                   | -    | N             | this study |
| O26:H-    | 3641        | 2003.7.         | human  | Japan     | symptomatic (diarrhea)                            | beta1            | NT                                | -                   | -    | N             | this study |
| OUT:HND   | 3124        | 2003.8.5        | human  | Japan     | symptomatic (bloody stool, abdominal pain, fever) | epsilon2         | selC                              | -                   | -    | Y             | this study |
| O55:H7    | 3649        | 2003.8.1        | human  | Japan     | symptomatic (diarrhea)                            | gamma1           | selC                              | -                   | -    | N             | this study |
| O128:H2   | 3705        | 2003.8.29       | human  | Japan     | symptomatic (diarrhea)                            | beta1            | NT                                | -                   | -    | N             | this study |
| O26:HNM   | 03706-2     | 2003.9.3        | human  | Japan     | NI                                                | beta1            | NT                                | -                   | -    | N             | this study |
| O55:H7    | 4676        | 2004.9.17       | human  | Japan     | symptomatic (diarrhea)                            | iota1            | selC                              | -                   | -    | N             | this study |
| O153:HND  | 4679        | 2004.9.24       | human  | Japan     | symptomatic (diarrhea)                            | beta1            | NT                                | -                   | -    | N             | this study |
| O142:HUT  | 6592        | 2006.6.2        | human  | Japan     | symptomatic (diarrhea, abdominal pain)            | alpha1           | selC                              | -                   | -    | Y             | this study |
| O55:H7    | 7575        | 2007.5.16       | human  | Japan     | symptomatic (diarrhea)                            | gamma1           | selC                              | -                   | -    | N             | this study |
| O55:H7    | 7675        | 2007.7.23       | human  | Japan     | symptomatic (diarrhea)                            | gamma1           | selC                              | -                   | -    | N             | this study |
| O55:H7    | 7693        | 2007.8.1        | human  | Japan     | symptomatic (diarrhea)                            | gamma1           | selC                              | -                   | -    | N             | this study |
| O55:H7    | 7707        | 2007.8.8        | human  | Japan     | symptomatic (diarrhea)                            | gamma1           | selC                              | -                   | -    | N             | this study |
| O119:H-   | 7753        | 2007.8.30       | human  | Japan     | symptomatic (diarrhea)                            | beta1            | pheU                              | -                   | -    | N             | this study |
| O124:HUT  | 7852        | 2007.10.23      | human  | Japan     | symptomatic (diarrhea)                            | theta            | NT                                | -                   | -    | Y             | this study |
| O26:H-    | 7857        | 2007.10.29      | human  | Japan     | NI                                                | beta1            | NT                                | -                   | -    | N             | this study |
| O74:HND   | 7871        | 2007.11.9       | human  | Japan     | symptomatic (diarrhea)                            | iota1            | selC                              | -                   | -    | Y             | this study |
| O103:H-   | 7929        | 2007.12.4       | human  | Japan     | symptomatic (bloody stool)                        | beta1            | NT                                | -                   | -    | Y             | this study |
| O103      | NIAH_Por_1  | 2007            | pig    | Japan     | rectal swab, healthy                              | beta1            | NT                                | -                   | -    | Y             | this study |
| OUT       | NIAH_Por_2  | 2007            | pig    | Japan     | rectal swab, healthy                              | gamma1           | selC                              | -                   | -    | N             | this study |
| OUT       | NIAH_Por_4  | 2007            | pig    | Japan     | rectal swab, healthy                              | gamma1           | selC                              | -                   | -    | N             | this study |
| O49       | NIAH_Por_5  | 2007            | pig    | Japan     | rectal swab, healthy                              | kappa            | selC                              | -                   | -    | Y             | this study |
| O117      | NIAH_Por_8  | 2007            | pig    | Japan     | rectal swab, healthy                              | theta            | pheV                              | -                   | -    | N             | this study |
| OUT       | NIAH_Por_9  | 2007            | pig    | Japan     | rectal swab, healthy                              | gamma1           | selC                              | -                   | -    | N             | this study |
| O88       | NIAH_Por_10 | 2007            | pig    | Japan     | rectal swab, healthy                              | beta1            | pheU                              | -                   | -    | Y             | this study |
| O76       | NIAH_Por_11 | 2007            | pig    | Japan     | rectal swab, healthy                              | theta            | NT                                | -                   | -    | N             | this study |
| O145      | NIAH_Por_12 | 2007            | pig    | Japan     | rectal swab, healthy                              | gamma1           | selC                              | -                   | -    | Y             | this study |
| OUT       | NIAH_Por_13 | 2007            | pig    | Japan     | rectal swab, healthy                              | xi               | NT                                | -                   | -    | N             | this study |
| O26       | NIAH_Por_14 | 2007            | pig    | Japan     | rectal swab, healthy                              | xi               | NT                                | -                   | -    | Y             | this study |
| O2        | NIAH_Por_15 | 2007            | pig    | Japan     | rectal swab, healthy                              | iota1            | selC                              | -                   | -    | Y             | this study |
| O145      | NIAH_Por_16 | 2007            | pig    | Japan     | rectal swab, healthy                              | gamma1           | selC                              | -                   | -    | N             | this study |
| O53       | NIAH_Por_17 | 2007            | pig    | Japan     | rectal swab, healthy                              | gamma1           | selC                              | -                   | -    | Y             | this study |

| Serotype† | strain name  | year of isolate | origin | countries | symptoms or notes                     | intimin subtypes | LEE integration sites (tRNA gene) | presence or absence |      | MLST analysis | References |
|-----------|--------------|-----------------|--------|-----------|---------------------------------------|------------------|-----------------------------------|---------------------|------|---------------|------------|
|           |              |                 |        |           |                                       |                  |                                   | stx1&2&f            | cdtB |               |            |
| O117      | NIAH_Por_18  | 2007            | pig    | Japan     | rectal swab, healthy                  | theta            | pheV                              | -                   | -    | N             | this study |
| O172      | NIAH_Por_19  | 2007            | pig    | Japan     | rectal swab, healthy                  | gamma1           | selC                              | -                   | -    | Y             | this study |
| O172      | NIAH_Por_20  | 2007            | pig    | Japan     | rectal swab, healthy                  | gamma1           | selC                              | -                   | -    | N             | this study |
| O117      | NIAH_Por_21  | 2007            | pig    | Japan     | rectal swab, healthy                  | theta            | pheV                              | -                   | -    | N             | this study |
| O117      | NIAH_Por_22  | 2007            | pig    | Japan     | rectal swab, healthy                  | theta            | pheV                              | -                   | -    | N             | this study |
| O117      | NIAH_Por_23  | 2007            | pig    | Japan     | rectal swab, healthy                  | theta            | pheV                              | -                   | -    | N             | this study |
| O172      | NIAH_Por_24  | 2007            | pig    | Japan     | rectal swab, healthy                  | gamma1           | selC                              | -                   | -    | N             | this study |
| O156      | NIAH_Por_25  | 2007            | pig    | Japan     | rectal swab, healthy                  | theta            | NT                                | -                   | -    | N             | this study |
| O98       | NIAH_Por_26  | 2007            | pig    | Japan     | rectal swab, healthy                  | theta            | pheU                              | -                   | -    | N             | this study |
| OUT       | NIAH_Por_27  | 2007            | pig    | Japan     | rectal swab, healthy                  | xi               | pheU                              | -                   | -    | N             | this study |
| O49       | NIAH_Por_33  | 2007            | pig    | Japan     | rectal swab, healthy                  | kappa            | selC                              | -                   | -    | N             | this study |
| OUT       | NIAH_Por_34  | 2007            | pig    | Japan     | rectal swab, healthy                  | theta            | pheV                              | -                   | -    | N             | this study |
| O172      | NIAH_Por_35  | 2007            | pig    | Japan     | rectal swab, healthy                  | gamma1           | selC                              | -                   | -    | N             | this study |
| O8        | NIAH_Por_36  | 2007            | pig    | Japan     | rectal swab, healthy                  | gamma1           | selC                              | -                   | -    | Y             | this study |
| O145      | NIAH_Por_37  | 2007            | pig    | Japan     | rectal swab, healthy                  | gamma1           | selC                              | -                   | -    | N             | this study |
| O145      | NIAH_Por_38  | 2007            | pig    | Japan     | rectal swab, healthy                  | gamma1           | selC                              | -                   | -    | N             | this study |
| O53       | NIAH_Por_40  | 2007            | pig    | Japan     | rectal swab, healthy                  | gamma1           | selC                              | -                   | -    | N             | this study |
| O71       | NIAH_Bird_1  | 2003            | Bird   | Japan     | feces, <i>Treron sieboldii</i>        | kappa            | selC                              | -                   | -    | Y             | this study |
| OUT       | NIAH_Bird_2  | 2002            | Bird   | Japan     | feces, <i>Sturnus cineraceus</i>      | sigma            | pheU                              | -                   | +    | Y‡            | this study |
| O115      | NIAH_Bird_3  | 2004            | Bird   | Japan     | feces, <i>Puffinus tenuirostris</i>   | N1.1             | pheU                              | -                   | +    | Y‡            | this study |
| O137      | NIAH_Bird_4  | 2004            | Bird   | Japan     | feces, <i>Passer montanus</i>         | beta2            | selC                              | -                   | -    | Y             | this study |
| O128      | NIAH_Bird_5  | 2004            | Bird   | Japan     | feces, <i>Puffinus tenuirostris</i>   | beta3            | pheU                              | -                   | +    | Y‡            | this study |
| O117      | NIAH_Bird_6  | 2004            | Bird   | Japan     | feces, <i>Hirundo rustica</i>         | mu               | selC                              | -                   | -    | Y             | this study |
| O117      | NIAH_Bird_7  | 2004            | Bird   | Japan     | feces, <i>Passer montanus</i>         | mu               | selC                              | -                   | -    | N             | this study |
| O64       | NIAH_Bird_8  | 2004            | Bird   | Japan     | feces, <i>Egretta garzetta</i>        | epsilon4         | pheU                              | -                   | +    | Y‡            | this study |
| O21       | NIAH_Bird_9  | 2004            | Bird   | Japan     | feces, <i>Hirundo rustica</i>         | beta1            | NT                                | -                   | -    | Y             | this study |
| O81       | NIAH_Bird_10 | 2004            | Bird   | Japan     | feces, <i>Anas poecilorhyncha</i>     | beta2            | selC                              | -                   | +    | Y             | this study |
| O55       | NIAH_Bird_11 | 2005            | Bird   | Japan     | feces, <i>Emberiza cioides</i>        | theta            | NT                                | -                   | -    | N             | this study |
| O2        | NIAH_Bird_12 | 2005            | Bird   | Japan     | feces, <i>Sturnus cineraceus</i>      | beta1            | NT                                | -                   | -    | Y             | this study |
| OUT       | NIAH_Bird_13 | 2005            | Bird   | Japan     | feces, <i>Hypsipetes amaurotis</i>    | xi               | pheU                              | -                   | +    | Y‡            | this study |
| O55       | NIAH_Bird_15 | 2005            | Bird   | Japan     | feces, <i>Cyanopica cyana</i>         | theta            | NT                                | -                   | -    | N             | this study |
| O103      | NIAH_Bird_16 | 2005            | Bird   | Japan     | feces, <i>Passer montanus</i>         | N1.1             | pheU                              | -                   | +    | Y‡            | this study |
| O55       | NIAH_Bird_17 | 2005            | Bird   | Japan     | feces, <i>Streptopelia orientalis</i> | theta            | NT                                | -                   | -    | N             | this study |
| O120      | NIAH_Bird_18 | 2005            | Bird   | Japan     | feces, <i>Anas strepera</i>           | pi               | selC                              | -                   | -    | N             | this study |
| O132      | NIAH_Bird_19 | 2005            | Bird   | Japan     | feces, <i>Columba livia</i>           | alpha2           | selC                              | -                   | -    | N             | this study |
| O132      | NIAH_Bird_20 | 2005            | Bird   | Japan     | feces, <i>Columba livia</i>           | alpha2           | selC                              | -                   | -    | Y             | this study |
| O50       | NIAH_Bird_21 | 2005            | Bird   | Japan     | feces, <i>Streptopelia orientalis</i> | alpha1           | selC                              | -                   | -    | Y             | this study |

| Serotype† | strain name  | year of isolate | origin | countries | symptoms or notes                                           | intimin subtypes | LEE integration sites (tRNA gene) | presence or absence |      | MLST analysis | References |
|-----------|--------------|-----------------|--------|-----------|-------------------------------------------------------------|------------------|-----------------------------------|---------------------|------|---------------|------------|
|           |              |                 |        |           |                                                             |                  |                                   | stx1&2&2f           | cdtB |               |            |
| O171      | NIAH_Bird_22 | 2005            | Bird   | Japan     | feces, <i>Phalacrocorax carbo</i>                           | epsilon2         | selC                              | -                   | -    | Y             | this study |
| O58       | NIAH_Bird_23 | 2006            | Bird   | Japan     | feces, <i>Phalacrocorax carbo</i>                           | epsilon1         | pheU                              | -                   | +    | Y‡            | this study |
| O147      | NIAH_Bird_24 | 2006            | Bird   | Japan     | feces, <i>Cyanopica cyana</i>                               | sigma            | pheU                              | -                   | +    | Y‡            | this study |
| O8        | NIAH_Bird_25 | 2006            | Bird   | Japan     | feces, <i>Passer montanus</i>                               | sigma            | pheU                              | -                   | +    | Y‡            | this study |
| O128      | NIAH_Bird_26 | 2006            | Bird   | Japan     | feces, <i>Hypsipetes amaurotis</i>                          | beta3            | pheU                              | -                   | +    | Y‡            | this study |
| O8        | NIAH_Bird_27 | 2006            | Bird   | Japan     | feces, <i>Phalacrocorax carbo</i>                           | beta1            | NT                                | -                   | -    | N             | this study |
| O137      | NIAH_Bird_28 | 2006            | Bird   | Japan     | feces, <i>Zosterops japonica</i>                            | beta2            | selC                              | -                   | -    | N             | this study |
| O56       | NIAH_Bird_29 | 2005            | Bird   | Japan     | foot, <i>Hypsipetes amaurotis</i>                           | beta2            | selC                              | -                   | -    | Y             | this study |
| O55       | NIAH_Bird_30 | 2005            | Bird   | Japan     | foot, <i>Phalacrocorax carbo</i>                            | theta            | NT                                | -                   | -    | N             | this study |
| O132      | NIAH_Bird_31 | 2005            | Bird   | Japan     | foot, <i>Columba livia</i>                                  | alpha2           | selC                              | -                   | -    | N             | this study |
| O120      | NIAH_Bird_32 | 2005            | Bird   | Japan     | foot, <i>Coturnix japonica</i>                              | pi               | selC                              | -                   | -    | Y             | this study |
| O110      | NIAH_Bird_33 | 2006            | Bird   | Japan     | foot, <i>Puffinus tenuirostris</i>                          | beta2            | selC                              | -                   | -    | Y             | this study |
| O2        | NIAH_Bird_34 | 2006            | Bird   | Japan     | foot, <i>Columba livia</i>                                  | kappa            | selC                              | -                   | -    | Y             | this study |
| O55       | NIAH_Bird_35 | 2006            | Bird   | Japan     | foot, <i>Hypsipetes amaurotis</i>                           | theta            | NT                                | -                   | -    | N             | this study |
| O8        | NIAH_Bird_36 | 2006            | Bird   | Japan     | foot, <i>Phalacrocorax carbo</i>                            | beta1            | NT                                | -                   | -    | Y             | this study |
| O55       | NIAH_Bird_37 | 2006            | Bird   | Japan     | foot, <i>Sturnus cineraceus</i>                             | theta            | NT                                | -                   | -    | N             | this study |
| O55       | NIAH_Bird_38 | 2006            | Bird   | Japan     | foot, <i>Columba livia</i>                                  | theta            | NT                                | -                   | -    | N             | this study |
| O103:H2   | 00E001       | 2000            | human  | Japan     | symptomatic (diarrhea, abdominal pain, fever)               | epsilon1         | NT                                | stx1                | -    | Y             | this study |
| O150:H11  | 00E019       | 2000            | human  | Japan     | symptomatic (diarrhea, bloody stool, abdominal pain, fever) | beta1            | pheU                              | stx1                | -    | Y             | this study |
| O103:H11  | 01E015       | 2001            | human  | Japan     | symptomatic (diarrhea, abdominal pain, fever)               | beta1            | pheU                              | stx1                | -    | Y             | this study |
| O103:H2   | 02E028       | 2002            | human  | Japan     | symptomatic (diarrhea, fever)                               | epsilon1         | NT                                | stx1                | -    | N             | this study |
| O165:H-   | 04E077       | 2000            | human  | Japan     | symptomatic (diarrhea, abdominal pain, fever)               | epsilon1         | NT                                | stx2                | -    | N             | this study |
| O121:H14  | 06E050       | 2006            | human  | Japan     | symptomatic (diarrhea, bloody stool)                        | epsilon1         | NT                                | stx2                | -    | Y             | this study |
| O103:H2   | 07E030       | 2007            | human  | Japan     | symptomatic (diarrhea, bloody stool, abdominal pain)        | epsilon1         | NT                                | stx1                | -    | N             | this study |
| O63:H6    | 07E033       | 2000            | human  | Japan     | symptomatic (diarrhea, abdominal pain)                      | (alpha2)         | selC                              | stx2f               | +    | Y             | this study |
| O165:H-   | 07E051       | 2007            | human  | Japan     | symptomatic (diarrhea, bloody stool, abdominal              | epsilon1         | NT                                | stx1&2              | -    | Y             | this study |

| Serotype† | strain name  | year of isolate | origin | countries | symptoms or notes                                                  | intimin subtypes | LEE integration sites (tRNA gene) | presence or absence |      | MLST analysis | References                    |
|-----------|--------------|-----------------|--------|-----------|--------------------------------------------------------------------|------------------|-----------------------------------|---------------------|------|---------------|-------------------------------|
|           |              |                 |        |           |                                                                    |                  |                                   | stx1&2&2f           | cdtB |               |                               |
|           |              |                 |        |           | pain)                                                              |                  |                                   |                     |      |               |                               |
| O118:H-   | 07E054       | 2007            | human  | Japan     | symptomatic (diarrhea, abdominal pain)                             | beta1            | NT                                | stx1                | -    | Y             | this study                    |
| O103:H2   | 08E011       | 2008            | human  | Japan     | asymptomatic carrier                                               | epsilon1         | NT                                | stx1                | -    | N             | this study                    |
| O103:HUT  | 08E021       | 2008            | human  | Japan     | asymptomatic carrier                                               | theta            | NT                                | stx1                | -    | N             | this study                    |
| O121:H19  | 08E027       | 2008            | human  | Japan     | symptomatic (diarrhea, bloody stool, abdominal pain, fever)        | epsilon1         | NT                                | stx2                | -    | N             | this study                    |
| O76:H-    | 08E035       | 2008            | human  | Japan     | asymptomatic carrier                                               | gamma1           | NT                                | stx1                | -    | Y             | this study                    |
| O165:H-   | 08E132       | 2008            | human  | Japan     | symptomatic (bloody stool, abdominal pain, vomiting, fever)        | epsilon1         | NT                                | stx1&2              | -    | N             | this study                    |
| O165      | osen07-074   | 2007            | Bovid  | Japan     | food                                                               | epsilon1         | NT                                | stx2                | -    | N             | this study                    |
| OUT       | CB10113      | 2004            | cat    | Brazil    | domestic (asymptomatic carrier)                                    | ypsilon          | pheU                              | -                   | -    | Y‡            | Morato <i>et al.</i> , 2009f  |
| ONT       | CB9637       | 2003            | human  | Germany   | symptomatic (diarrhea)                                             | rho              | pheU                              | -                   | -    | N             | this study                    |
| O180      | CB9776       | 2003            | human  | Germany   | symptomatic (diarrhea)                                             | rho              | pheU                              | -                   | -    | Y             | this study                    |
| O65       | CB9786       | 2003            | human  | Germany   | symptomatic (diarrhea)                                             | alpha8           | pheU                              | -                   | +    | Y‡            | this study                    |
| O168      | CB9791       | 2003            | human  | Germany   | symptomatic (diarrhea)                                             | alpha8           | pheU                              | -                   | +    | Y‡            | this study                    |
| O180      | DG172/5      | 1990            | sheep  | Germany   | asymptomatic carrier                                               | rho              | pheU                              | -                   | -    | N             | this study                    |
| NT:H19    | 0471-1       | 1989            | human  | Brazil    | symptomatic (diarrhea)                                             | rho              | pheU                              | -                   | -    | Y             | Ooka <i>et al.</i> , 2008j    |
| NT:HNM    | 4051-6       | 1989            | human  | Brazil    | symptomatic (diarrhea)                                             | omicron          | pheU                              | -                   | +    | Y‡            | Ooka <i>et al.</i> , 2008j    |
| NI        | A09/332.1    | 2008.11         | deer   | Belgium   | <i>Capreolus capreolus</i> (asymptomatic)                          | epsilon2         | selC                              | -                   | -    | Y             | Bardiau <i>et al.</i> , 2010¶ |
| O115:HNM  | HIPH08472    | 2008.8          | human  | Japan     | symptomatic (diarrhea)                                             | N2               | pheU                              | stx2f               | +    | Y‡            | this study                    |
| OUT:H-    | E2675        | 2007            | bird   | Japan     | feces swab, <i>Corvus</i> spp.                                     | N1.2             | pheU                              | stx2f               | +    | Y‡            | this study                    |
| O156:H25  | RIMD05091872 | 2003            | human  | Japan     | asymptomatic carrier                                               | zeta             | pheV                              | stx1                | -    | Y             | this study                    |
| O55:H6    | F76193       | NI              | human  | SSI       | symptomatic (diarrhea)                                             | alpha2           | selC                              | -                   | -    | Y             | Iida <i>et al.</i> , 2001§    |
| O153:HNM  | HIPH07217    | 2007.8          | human  | Japan     | symptomatic (diarrhea, fever)                                      | beta1            | NT                                | stx2f               | +    | Y             | this study                    |
| O63:H6    | HIPH07137    | 2007.8          | human  | Japan     | symptomatic (diarrhea, abdominal pain)                             | alpha2           | selC                              | stx2f               | -    | Y             | this study                    |
| O145:H34  | HIPH08592    | 2008.10         | human  | Japan     | symptomatic (diarrhea, fever)                                      | iota1            | selC                              | stx2f               | +    | Y             | this study                    |
| O128:HNM  | EC2175       | 2002.7.28       | human  | Japan     | symptomatic (one year old, diarrhea, bloody mucus stool, vomiting) | beta1            | NT                                | stx2f               | +    | Y             | this study                    |
| O63:H6    | EC2689       | 2006.9.16       | human  | Japan     | symptomatic (four years old, fever, cough, soft stool)             | alpha2           | selC                              | stx2f               | +    | N             | this study                    |
| O145:H34  | E2473        | 2006.8          | human  | Japan     | symptomatic (diarrhea, bloody stool, abdominal pain, fever)        | iota1            | selC                              | stx2f               | +    | N             | this study                    |

| Serotype† | strain name | year of isolate | origin | countries | symptoms or notes                      | intimin subtypes | LEE integration sites (tRNA gene) | presence or absence |      | MLST analysis | References |
|-----------|-------------|-----------------|--------|-----------|----------------------------------------|------------------|-----------------------------------|---------------------|------|---------------|------------|
|           |             |                 |        |           |                                        |                  |                                   | stx1&2&2f           | cdtB |               |            |
| O63:H6    | A32         | 2003.8          | human  | Japan     | symptomatic (diarrhea, abdominal pain) | alpha2           | selC                              | stx2f               | -    | N             | this study |

NI: no information, NT: not typed

†: Determined by the serotyping system for *E. coli*.

‡: *E. albertii* strains (confirmed by MLS analysis).

f: Morato *et al.* (2009) Domestic cats constitute a natural reservoir of human enteropathogenic *Escherichia coli* Types. Zoonoses Public Health. 56: 229-237.

j: Ooka T *et al.* (2007) Characterization of tccP2 carried by atypical enteropathogenic *Escherichia coli*. FEMS Microbiol Lett. 271: 126-135.

¶: Bardiau M *et al.* (2010) Enteropathogenic (EPEC), enterohaemorrhagic (EHEC) and verotoxigenic (VTEC) *Escherichia coli* in wild cervids. J Appl Microbiol. 109: 2214-2222.

§: Iida K *et al.* (2001) Type 1 fimbriation and its phase switching in diarrheagenic *Escherichia coli* strains. Clin Diagn Lab Immunol. 8: 489-495.

Technical Appendix Table 2. PCR primers for detection and sequencing of the *stx* and *cdt* genes

| target gene                                              | primer name | sequence (5'-3')           | PCR conditions (30 cycles) | Size of amplicon (bp) | References                                |
|----------------------------------------------------------|-------------|----------------------------|----------------------------|-----------------------|-------------------------------------------|
| 5' half of <i>eae</i>                                    | cesT-F9     | TCAGGGAATAACATTAGAAA       | 92 } C, 60 s /             | around 1.3 kb         | Lacher <i>et al.</i> , 2006 <sup>f</sup>  |
|                                                          | eae-F1      | ACTCCGATTCCCTCTGGTGAC      | 55 } C, 60 s /             |                       |                                           |
|                                                          | eae-R3      | TCTTGTGCGCTTTGGCTT         | 72 } C, 2 min              |                       |                                           |
| 3' half of <i>eae</i> inside of <i>eae</i>               | escD-R1     | GTATCAACATCTCCCGCCCA       | 92 } C, 60 s /             | around 1.6 kb         | Lacher <i>et al.</i> , 2006 <sup>f</sup>  |
|                                                          | 1669-1688§  | CAGGTTGGGGTAACGGACTT       | 52 } C, 60 s /             |                       |                                           |
| <i>stx1</i>                                              | stx1-F      | GTCATTTCGCTCTGCAATAGGTAC   | 72 } C, 2 min              | 151                   | this study                                |
|                                                          | stx1-R      | GCCGTAGATTATTAACCGCCCT     | 94 } C, 30 s /             |                       |                                           |
| <i>stx2</i> , <i>stx2c</i> , <i>stx2d</i> , <i>stx2e</i> | stx2-F      | CCATGACAACGGACAGCAGTT      | 64 } C, 30 s /             | 181                   | Ooka <i>et al.</i> , 2009 <sup>j</sup>    |
|                                                          | stx2-R      | CTGCTGTGACAGTGACAAAACG     | 72 } C, 90 s               |                       |                                           |
|                                                          | 128-1       | AGATTGGGCGTCATTCACTGGTTG   | 94 } C, 30 s /             |                       |                                           |
| <i>stx2f</i>                                             | 128-2       | TACTTTAATGGCCGCCCTGTCTCC   | 57 } C, 60 s /             | 428                   | Schmidt <i>et al.</i> , 2000 <sup>¶</sup> |
| <i>cdtB</i> type I and IV                                | CDT-s2      | GAAAATAAATGGAACACACATGTCCG | 94 } C, 60 s /             | 466                   | Toth <i>et al.</i> , 2003 <sup>†</sup>    |
|                                                          | CDT-as2     | AAATCTCCTGCAATCATCCAGTTA   | 55 } C, 60 s /             |                       |                                           |
| <i>cdtB</i> type II, III, V                              | CDT-s1      | GAAAGTAAATGGAATATAAATGTCCG | 72 } C, 60 s               | 466                   | Toth <i>et al.</i> , 2003 <sup>†</sup>    |
|                                                          | CDT-as1     | AAATCACCAAGAATCATCCAGTTA   | 94 } C, 60 s /             |                       |                                           |

§: This primer is used only for sequencing of the *eae* gene.

<sup>f</sup>: Lacher DW *et al.* (2006) Allelic subtyping of the intimin locus (*eae*) of pathogenic *Escherichia coli* by fluorescent RFLP. FEMS Microbiol Lett. 261:80-87.

<sup>j</sup>: Ooka T *et al.* (2009) Development of a multiplex PCR-based rapid typing method for enterohemorrhagic *Escherichia coli* O157 strains. J Clin Microbiol. 47:2888-2894.

<sup>¶</sup>: Schmidt H *et al.* (2000) A new Shiga toxin 2 variant (Stx2f) from *Escherichia coli* isolated from pigeons. Appl Environ Microbiol. 66:1205-1208.

<sup>†</sup>: Toth I *et al.* (2003) Production of cytolethal distending toxins by pathogenic *Escherichia coli* strains isolated from human and animal sources: establishment of the existence of a new *cdt* variant (Type IV). J Clin Microbiol. 41:4285-4291.

Technical Appendix Table 3. Reference sequences of the *eae* genes

| subtype       | species of origin            | Serotype     | Strain name     | accession No. |
|---------------|------------------------------|--------------|-----------------|---------------|
| α1 (alpha1)   | <i>Escherichia coli</i>      | O127:H6      | E2348/69        | AF022236      |
| α2 (alpha2)   | <i>Escherichia coli</i>      | O125:H6      | C712-65         | DQ523600      |
| α8 (alpha8)   | <i>Escherichia albertii</i>  | -            | I2005002880 36  | FJ609835      |
| β1 (beta1)    | <i>Escherichia coli</i>      | O26:H-       | 413/89-1        | AJ277443      |
| β2 (beta2)    | <i>Escherichia coli</i>      | O119:H6      | 0659-79         | DQ523605      |
| β3 (beta3)    | <i>Escherichia coli</i>      | -            | AEEC-H03/34136b | AJ876654      |
| ε1 (epsilon1) | <i>Escherichia coli</i>      | O103:H2      | MT#80           | DQ523606      |
| ε2 (epsilon2) | <i>Escherichia coli</i>      | O116:[H9]    | 98B3            | DQ523614      |
| ε3 (epsilon3) | <i>Escherichia coli</i>      | -            | AEEC-H03/31923a | AJ876649      |
| ε4 (epsilon4) | <i>Escherichia coli</i>      | -            | AEEC-H03/37159a | AJ876651      |
| η (eta)       | <i>Escherichia coli</i>      | O142:[H21]   | 012-050982      | DQ523604      |
| η2 (eta2)     | <i>Escherichia coli</i>      | -            | AEEC-H03/53199a | AJ876652      |
| γ1 (gamma1)   | <i>Escherichia coli</i>      | O157:H7      | Sakai           | BAB37982.1    |
| γ2 (gamma2)   | <i>Escherichia coli</i>      | O111:H-      | 95NR1           | AF025311      |
| ι1 (iota1)    | <i>Escherichia coli</i>      | O55:[H34/47] | 1252-59         | DQ523601      |
| ι2 (iota2)    | <i>Shigella boydii</i>       | 13           | C-425           | AY696842      |
| κ (kappa)     | <i>Escherichia coli</i>      | O49:[H10]    | 64B4            | DQ523611      |
| λ (lambda)    | <i>Escherichia coli</i>      | O33:[H34]    | 57A1            | DQ523609      |
| μ (mu)        | <i>Escherichia coli</i>      | O55:[H51]    | MA551/1         | DQ523607      |
| ν (nu)        | <i>Escherichia albertii</i>  | -            | 106A5           | DQ523615      |
| ο (omicron)   | <i>Escherichia albertii</i>  | -            | 19982           | AY696838      |
| π (pi)        | <i>Escherichia coli</i>      | -            | AEEC-191.2      | AJ705052      |
| ρ (rho)       | <i>Escherichia coli</i>      | 9314         | 9314            | DQ523613      |
| σ (sigma)     | <i>Escherichia coli</i>      | O86:K61:H-   | EPEC-EC74699    | AJ781125      |
| τ (tau)       | <i>Shigella boydii</i>       | 7            | K-1             | AY696839      |
| θ (theta)     | <i>Escherichia coli</i>      | O111:H8      | CL-37           | AF449418      |
| ξ (xi)        | <i>Escherichia coli</i>      | O5:[H2]      | 60A3            | DQ523610      |
| υ (ypsilon)   | <i>Escherichia coli</i>      | ONT          | CB10113         | AM116755.1    |
| ζ (zeta)      | <i>Escherichia coli</i>      | -            | 921-B4          | AF449417      |
| ζ3 (zeta3)    | <i>Escherichia coli</i>      | O85:H31      | FV10126         | FM872423      |
|               | <i>Citrobacter rodentium</i> | -            |                 |               |
| C. rodentium  | <i>rodentium</i>             | -            | DBS100          | AF311901      |

Technical Appendix Table 4. Shiga toxin production by the two *stx2f*-positive *E. albertii* strains

| Strain name            | Species            | prevalence of <i>stx</i> genes | VTEC-RPLA† |         |      |         | References |         |                                                              |      |
|------------------------|--------------------|--------------------------------|------------|---------|------|---------|------------|---------|--------------------------------------------------------------|------|
|                        |                    |                                | Stx1       |         | Stx2 |         |            |         |                                                              |      |
|                        |                    |                                | MMC+       | MMC-    | MMC+ | MMC-    |            |         |                                                              |      |
| HIPH08472              | <i>E. albertii</i> | <i>stx2f</i>                   | -          | -       | +    | (64)    | +          | (2)     | this study                                                   |      |
| E2675                  | <i>E. albertii</i> | <i>stx2f</i>                   | -          | -       | +    | (8)     | -          | -       | this study                                                   |      |
| LMG20976 (type strain) | <i>E. albertii</i> | -                              | -          | -       | -    | -       | -          | -       | this study                                                   |      |
| CB9786                 | <i>E. albertii</i> | -                              | -          | -       | -    | -       | -          | -       | this study                                                   |      |
| O128:HNM               |                    |                                |            |         |      |         |            |         |                                                              |      |
| EC1463                 | <i>E. coli</i>     | <i>stx2f</i>                   | -          | -       | +    | (> 128) | +          | (8)     | Isobe <i>et al.</i> , 2004‡<br>Hayashi <i>et al.</i> , 2001§ |      |
| O157:H7 Sakai          | <i>E. coli</i>     | <i>stx1, stx2</i>              | +          | (> 128) | +    | (>128)  | +          | (> 128) | +                                                            | (32) |

†: The maximum dilution of culture supernatant that exhibited agglutination is shown in parentheses.

‡: Isobe J *et al.* (2004) Isolation of *Escherichia coli* O128:HNM harboring *stx2f* gene from diarrhea patients Kansenshogaku Zasshi. 78: 1000-1005.

§: Hayashi T *et al.* (2001) Complete genome sequence of enterohemorrhagic *Escherichia coli* O157:H7 and genomic comparison with a laboratory strain K-12. DNA Res. 8: 11-22.

Technical Appendix Table 5. PCR primers for determination of the LEE integration sites†

| primer name | sequence (5'-3')            | target locus | location of the primers on the sequenced <i>E. coli</i> strains        | Expected amplicon size (bp) | References                    |
|-------------|-----------------------------|--------------|------------------------------------------------------------------------|-----------------------------|-------------------------------|
| escR-R      | ACTGGCGATACCATCATC<br>ATAC  | -            | escR gene on the LEE core region                                       | -                           | this study                    |
| pheV-Ro1    | CAGGTATGTACCTTCACC<br>GTTGG | <i>pheV</i>  | 26,337 bp downstream of the <i>pheV</i> 3'-end of K-12 strain MG1655   | around 30 kb                | this study                    |
| pheV-glcB   | ACAATGAGTCAAACCATA<br>ACCCA | <i>pheV</i>  | 13,367 bp downstream of the <i>pheV</i> 3' end of K-12 strain MG1655   | around 17 kb                | this study                    |
| selC-Ro1    | CACGGCGGCAATCAGAA<br>CGTTC  | <i>selC</i>  | 1,984 bp downstream of the <i>selC</i> 3'-end of O103:H2 strain 12009  | around 5 kb                 | this study                    |
| 433-f       | ACGCGGGATTGGTTTTGG<br>TCAG  | <i>pheU</i>  | 14,687 bp downstream of the <i>pheU</i> 3'-end of O157:H7 strain Sakai | around 18 kb                | Ohnishi <i>et al.</i> , 2002§ |

†: PCR cycle; 2 min at 96°C, followed by 30 cycles of 20 s at 96°C and 16 min at 69°C.

§: Ohnishi M *et al.* (2002) Genomic diversity of enterohemorrhagic *Escherichia coli* O157 revealed by whole genome PCR scanning. *Proc Natl Acad Sci USA*. 99:17043-17048.
